# Supplementary material for: Analysis of the efficacy and prognostic factors of PD-1 inhibitors in advanced gallbladder cancer
Source: PubMed Central journal article supplement — Ann Transl Med. 2021 Oct;9(20):1568. doi: 10.21037/atm-21-4747 (PMC8576663; doi:10.21037/atm-21-4747), 2021-10
Supplement: atm-09-20-1568-dss.pdf [file atm-09-20-1568-dss.pdf]

## Data Sharing Statement

|                     |                                                                                                                                                     |                                                                                                                                    |
|---------------------|-----------------------------------------------------------------------------------------------------------------------------------------------------|------------------------------------------------------------------------------------------------------------------------------------|
| <b>Article Info</b> | <a href="https://dx.doi.org/10.21037/atm-21-4747">https://dx.doi.org/10.21037/atm-21-4747</a>                                                       |                                                                                                                                    |
| <b>Item</b>         | <b>Question</b>                                                                                                                                     | <b>Authors' Response<br/>(place "-" if not applicable)</b>                                                                         |
| 1                   | Would you like to share data collected for your study to others?                                                                                    | NO                                                                                                                                 |
| 2                   | If not, would you like to share the reason for your decision?                                                                                       | This research is a long-term process, and the later data needs to be further studied, and it is temporarily inconvenient to share. |
| 3                   | What data in particular will be shared?                                                                                                             | -                                                                                                                                  |
| 4                   | Any other documents will be shared? Such as study protocol, statistical analysis plan, informed consent form, clinical study report, analytic code. | Statistical analysis plan, informed consent form, and clinical study report will also be shared if requested.                      |
| 5                   | When will data availability begin?                                                                                                                  | From the publication date.                                                                                                         |
| 6                   | When will data availability end?                                                                                                                    | Within three years from the date of publication                                                                                    |
| 7                   | To whom will you share the data?                                                                                                                    | Hepatobiliary Surgeon                                                                                                              |
| 8                   | For what type of analysis or purpose?                                                                                                               | For patients with advanced gallbladder cancer on immunotherapy                                                                     |
| 9                   | How or where can the data/documents be obtained?                                                                                                    | Emails could be sent to the address below to obtain the shared data:<br>944244758@qq.com                                           |
| 10                  | Any other restrictions?                                                                                                                             | We may balance the potential benefits and risks for each request and then provide the data that could be shared.                   |
